# Supplementary material
Source: PubMed Central journal article supplement (PMC3522098)
Supplement: NIHMS383119-supplement-1.pdf [file NIHMS383119-supplement-1.pdf]

## Legends to Supplementary Figures

### Supplementary Figure S1

**a**, qPCR analysis of mRNAs in inguinal (subcutaneous), epididymal (visceral) or interscapular brown fat (BAT) depots for indicated genes. Samples were harvested from mice after three weeks of free wheel running or sedentary controls. The exercised mice were rested for 12 hours prior to analysis. Each group had n=10 mice. **b-c**, qPCR analysis of epididymal (visceral) (**b**) and inguinal (subcutaneous) (**c**) fat against indicated genes in mice after three weeks of swimming exercise (methods). Each group had n=10 mice. \* p<0.05 compared to control using students T-TEST.

### Supplementary Figure S2

**A**, QPCR analysis of mRNAs for indicated genes from muscle of PGC1 $\alpha$  muscle-specific knockout mice or flox/flox control animals. Each group had 5 mice. **b**, qPCR analysis of mRNA for indicated genes in muscle from mice subjected to 1 hour of acute exercise compared to sedentary mice. The mice were rested for 5 hours prior to analysis. **c**, qPCR analysis of indicated genes in muscle from mice subjected to 6 hours of cold exposure (4 degrees) compared to mice housed in room temperature. **d**, qPCR analysis of mRNA for indicated genes in inguinal fat from mice subjected to 1 hour of acute exercise compared to sedentary mice. The mice were rested for 5 hours prior to analysis. \* p<0.05 compared to control using students T-TEST

### Supplementary Figure S3

Affymetrix analysis shows all mRNAs significantly altered in expression arrays after 6 days of Fndc5 treatment (50nM) of SVF cells during differentiation compared to saline control.

Genes up regulated >4-fold or down regulated to < 0,4 fold are shown. FC= fold change and the “p=” column indicates p-value using T-TEST.

#### **Supplementary Figure S4**

**a**, This shows 8 genes whose expression was significantly induced with  $p < 0.05$  on gene expression arrays, with highest fold change in SVF treated with Fndc5 for 8 days. Brown fat-related genes are marked in bold. **b**, representative images of immunohistochemistry against UCP1 in SVF differentiated into adipocytes for 6 days in the presence of saline or recombinant Fndc5 (20 nM). Right graph shows BioPix quantification of UCP1 positive cells in 40 random images per group. **c**, representative electron microscopy of SVF differentiated into adipocytes for 6 days in the presence of saline or recombinant Fndc5 (20 nM). **d**, QPCR against indicated mRNAs in SVF from BAT, differentiated for 6 days in the presence or absence of 20nM Fndc5.

#### **Supplementary Figure S5**

**a**, qPCR from SVF from the inguinal fat depot, differentiated into adipocytes for 6 days and treated with 20nM Fndc5 at different days of differentiation, as indicated. This experiment was repeated once with similar results. **b**, mRNA expression of indicated mitochondrial genes from inguinal SVF treated with saline or Fndc5 for 6 days during differentiation. Data is presented as mean  $\pm$ SEM. \*  $p < 0.05$  compared to control using students one-way ANOVA.

#### **Supplementary Figure S6**

**a**, Homology between the mouse and human Fndc5. Red underline marks irisin. Amino acid sequence for homo sapiens, mus musculus, danio rerio and gallus gallus is shown, whereas homology is clear for regions other than the signal peptide at the n-terminal side. Presentation is formatted as MView with colors marking consensus/80% property. **b**, RT-PCR analysis of

mRNAs encoding indicated genes in adipocytes differentiated for 6 days from the stromal-vascular fraction (SVF) cells. This was done in the presence of conditioned media from primary myocytes with forced expression of GFP or PGC1 $\alpha$  and with antibodies against control/Fndc5 as indicated. Data presented is representative of 2 independent experiments. Data is presented as mean  $\pm$ SEM. \*  $p < 0.05$  compared to IgG control and §  $p < 0.05$  compared to IgG + PGC1 $\alpha$  conditioned media using one-way ANOVA.

### **Supplementary Figure S7**

**a**, anti-FLAG western blot against Albumin/IgG cleared and deglycosylated plasma from mice injected with GFP or n-terminally flag-tagged Fndc5 expressing adenovirus. **b**, western blot analysis of four human serum samples where the primary antibody has been pre-incubated with either recombinant Fndc5 (right) or BSA (left). **c**, standard curve of recombinant, n-terminally tagged Fndc5 for semi quantitative plasma irisin-measurements.

### **Supplementary Figure S8**

**a**, QPCR analysis of interscapular brown fat (BAT) against indicated genes in high-fat diet treated mice, 10 days after injection with Fndc5 or GFP expressing adenovirus. **b**, qPCR analysis for indicated mRNAs in inguinal WAT in high-fat diet treated mice, 10 days after injection with Fndc5 or GFP expressing adenovirus. **c**, qPCR analysis against indicated mRNAs in liver of high-fat diet treated mice, 10 days after injection with Fndc5 or GFP expressing adenovirus. **d**, Aspartate transaminase (AST) activity in plasma from mice 10 days after injection with Fndc5 or GFP expressing adenovirus (n=7 for each group). Data is presented as relative to control. \*  $p < 0.05$  compared to control using students T-TEST.

### **Supplementary Figure S9**

**a**, qPCR analysis of indicated genes from inguinal WAT in mice treated with HFD and injected with GFP or Fndc5 adenovirus. **b**, qPCR against indicated genes from inguinal WAT in 12 weeks B/6 mice on chow diet treated with GFP or Irisin expressing virus (n=7). These results were confirmed in an independent mouse cohort. \* p<0.05 compared to GFP adenovirus injection.

### **Supplementary Figure S10**

**a**, qPCR against indicated mRNAs from primary myotubes 48h after treatment with recombinant Fndc5 (100 nM) or saline control. **b**, qPCR analysis muscle (quadriceps) of indicated mRNAs in high-fat diet treated mice, 10 days after injection with Fndc5 or GFP expressing adenovirus.

**a**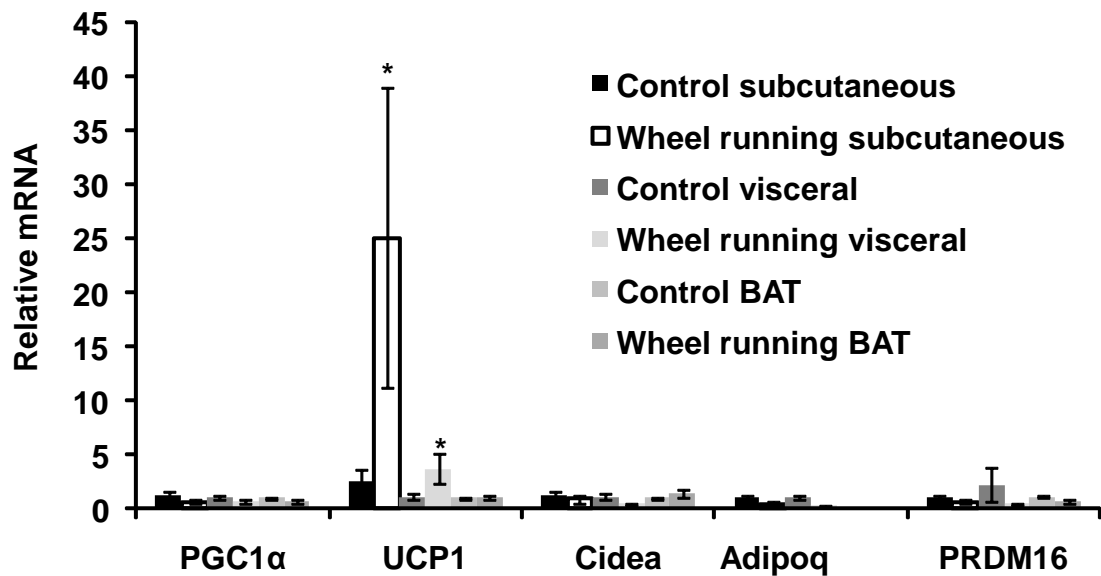**b**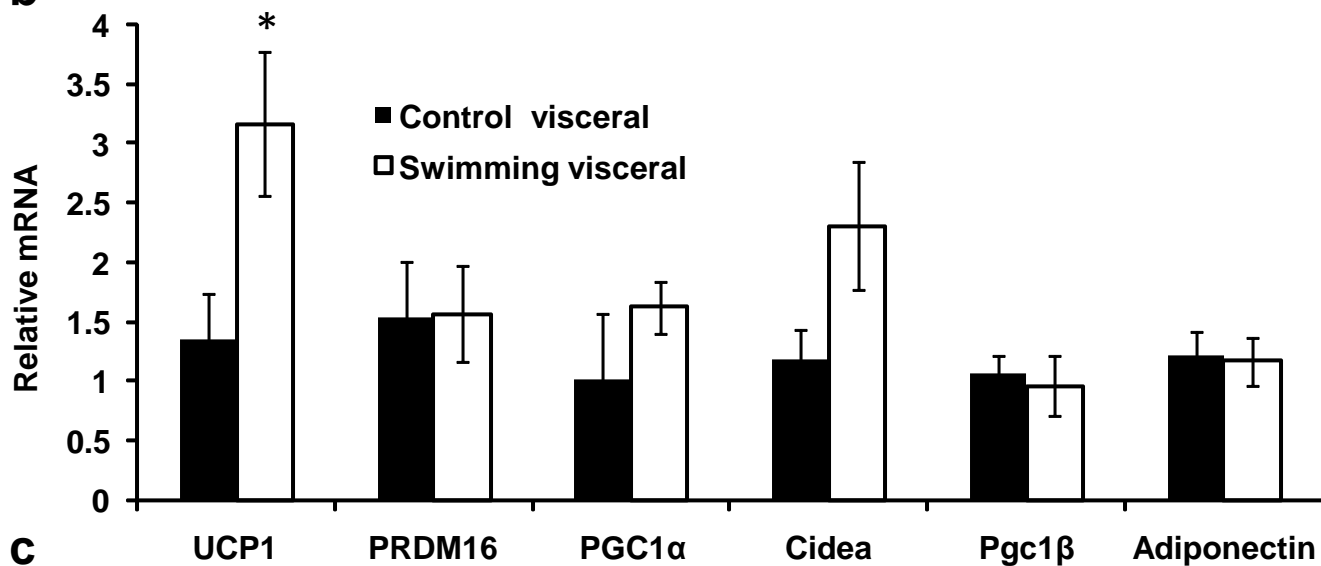**c**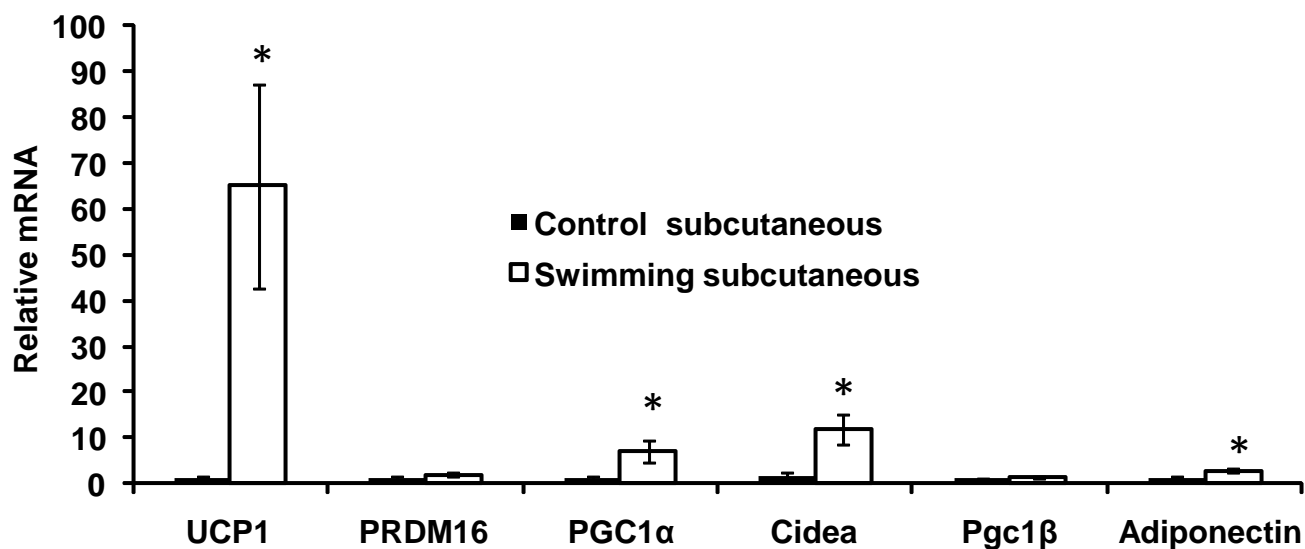

**a**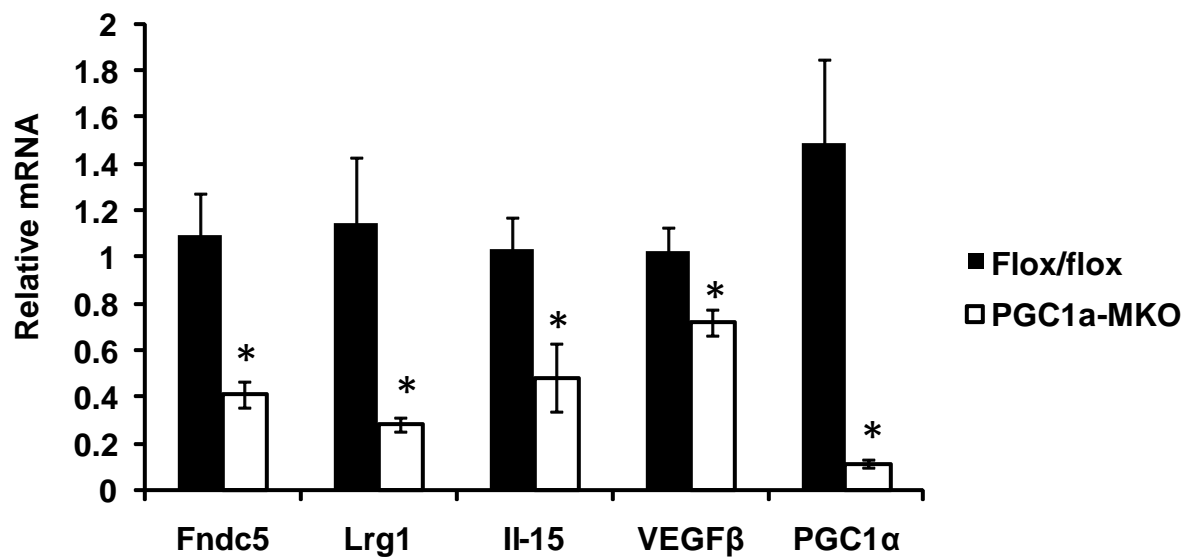**b**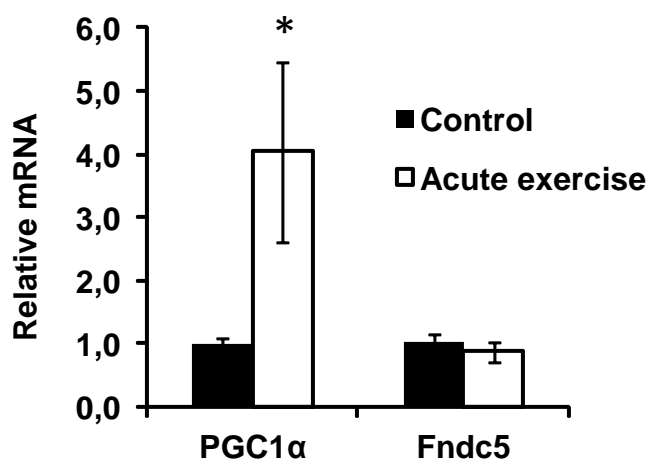**c**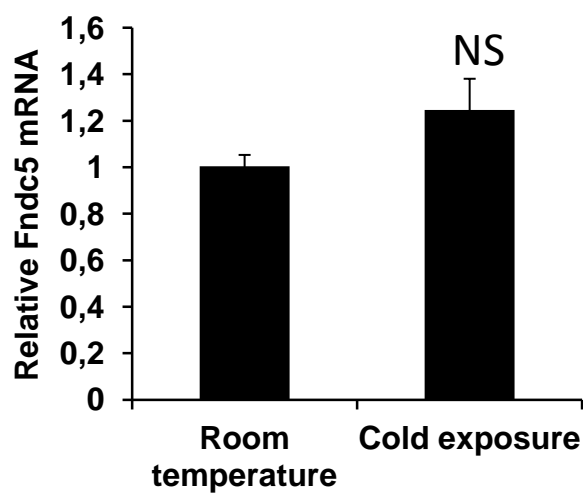**d**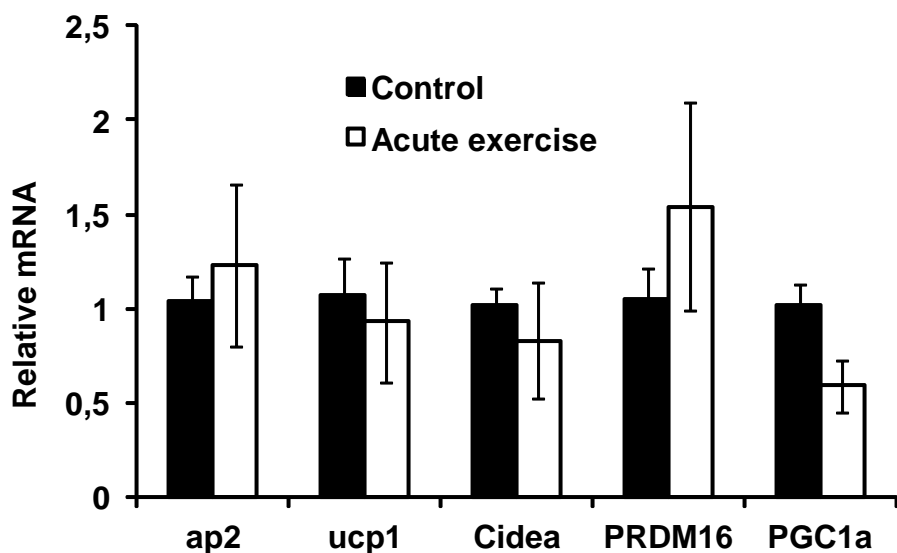

| gene                                                                     | FC    | p=       |
|--------------------------------------------------------------------------|-------|----------|
| Ucp1: uncoupling protein 1 (mitochondrial. proton carrier)               | 80.41 | 8.62E-05 |
| Otop1: otopenin 1                                                        | 25.98 | 6.87E-05 |
| Aadac: arylacetamide deacetylase (esterase)                              | 10.52 | 0.000211 |
| Cox7a1: cytochrome c oxidase. subunit VIIa 1                             | 7.73  | 1.01E-08 |
| Acaa1b: acetyl-Coenzyme A acyltransferase 1B                             | 7.50  | 5.36E-05 |
| Ubd: ubiquitin D                                                         | 7.03  | 3.45E-05 |
| Ncan: neurocan                                                           | 7.02  | 0.000319 |
| Elovl3: elongation of very long chain fatty acids-like 3                 | 6.91  | 0.000219 |
| Plin5: perilipin 5                                                       | 6.57  | 1.23E-05 |
| Cox8b: cytochrome c oxidase. subunit VIIIb                               | 6.48  | 5.62E-07 |
| Scd3: stearoyl-coenzyme A desaturase 3                                   | 6.17  | 0.011329 |
| carnitine palmitoyltransferase 1b. Muscle                                | 6.14  | 0.000143 |
| Itih4: inter alpha-trypsin inhibitor. heavy chain 4                      | 5.65  | 0.000318 |
| Car4: carbonic anhydrase 4                                               | 5.59  | 0.000885 |
| Cyp2e1: cytochrome P450. family 2. subfamily e. polypeptide 1            | 5.34  | 0.000716 |
| Slc25a34: solute carrier family 25. member 34                            | 5.21  | 3.17E-05 |
| Arg1: arginase. liver                                                    | 5.02  | 0.013321 |
| Car4: carbonic anhydrase 4                                               | 4.80  | 0.000302 |
| Sptlc3: serine palmitoyltransferase. long chain base subunit 3           | 4.63  | 0.00014  |
| Acaa2: acetyl-Coenzyme A acyltransferase 2                               | 4.48  | 0.00187  |
| Mpzl2: myelin protein zero-like 2                                        | 4.36  | 0.000588 |
| Reep1: receptor accessory protein 1                                      | 4.31  | 0.000319 |
| Acer2: alkaline ceramidase 2                                             | 4.30  | 0.000991 |
| Gys2: glycogen synthase 2                                                | 4.14  | 3.59E-07 |
| Gpr120: G protein-coupled receptor 120                                   | 4.01  | 0.000986 |
| Gpld1: glycosylphosphatidylinositol specific phospholipase D1            | 0.39  | 0.031602 |
| Asb4: ankyrin repeat and SOCS box-containing 4                           | 0.39  | 0.019371 |
| Mm.207312.1                                                              | 0.38  | 0.001832 |
| Cyp2f2: cytochrome P450. family 2. subfamily f. polypeptide 2            | 0.37  | 0.000688 |
| Odd3: odd Oz/ten-m homolog 3 (Drosophila)                                | 0.37  | 0.000236 |
| Zfp207: zinc finger protein 207                                          | 0.36  | 0.039105 |
| Ntn4: netrin 4                                                           | 0.36  | 0.001783 |
| Higd1b: HIG1 domain family. member 1B                                    | 0.35  | 0.000626 |
| Myh11: myosin. heavy polypeptide 11. smooth muscle                       | 0.34  | 0.000105 |
| Serpina1b: serine (or cysteine) preptidase inhibitor. clade A. member 1B | 0.32  | 7.31E-06 |
| Aplnr: apelin receptor                                                   | 0.31  | 5.19E-06 |
| Mtx3: metaxin 3                                                          | 0.28  | 0.001888 |
| Serpina1a                                                                | 0.27  | 1.95E-05 |
| Oxtr: oxytocin receptor                                                  | 0.24  | 6.85E-05 |
| 4921521F21Rik: RIKEN cDNA 4921521F21 gene                                | 0.24  | 0.000241 |
| Rgs5: regulator of G-protein signaling 5                                 | 0.19  | 0.00216  |
| Lep: leptin                                                              | 0.15  | 0.000173 |
| Mup5: major urinary protein 5                                            | 0.12  | 0.00016  |
| Mup3: major urinary protein 1                                            | 0.07  | 1.64E-06 |

| <b>a</b> | gene          | fold change | p      |
|----------|---------------|-------------|--------|
|          | <b>Ucp1</b>   | 80.41       | 0.0001 |
|          | <b>Otop1</b>  | 25.98       | 0.0001 |
|          | Aadac         | 10.52       | 0.0002 |
|          | <b>Cox7a1</b> | 7.73        | 0.0000 |
|          | Acaa1b        | 7.50        | 0.0001 |
|          | Ubd           | 7.03        | 0.0000 |
|          | Ncan          | 7.02        | 0.0003 |
|          | <b>Elovl3</b> | 6.91        | 0.0002 |

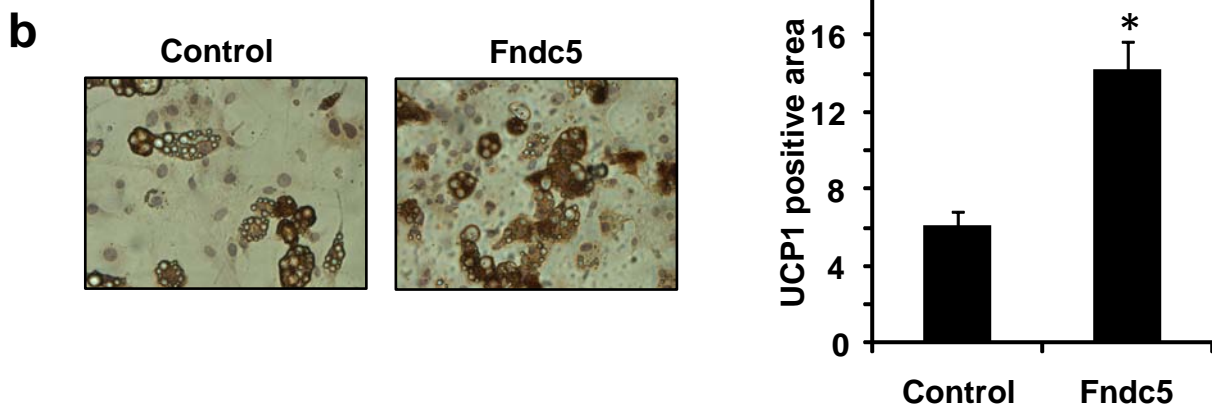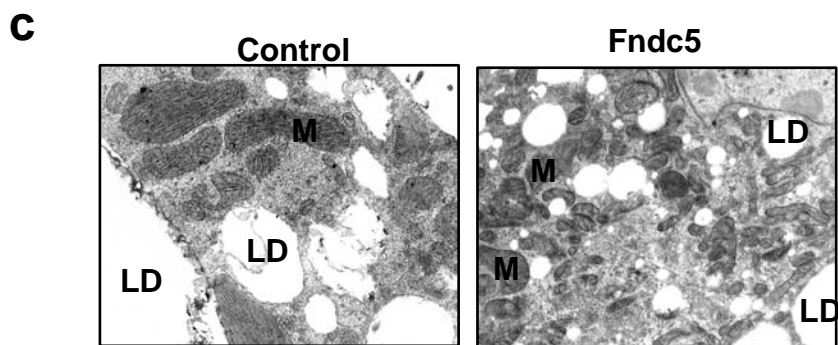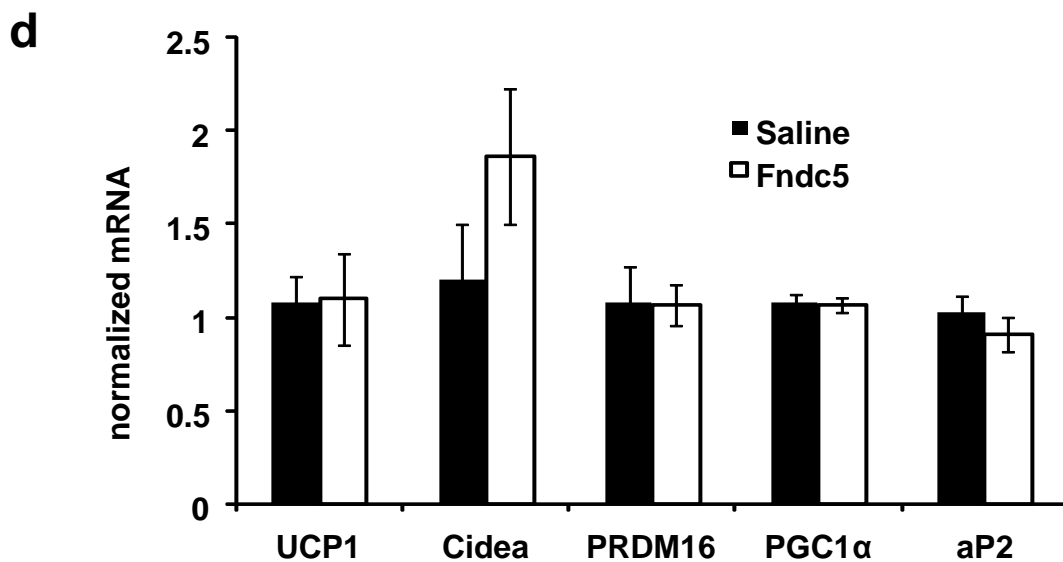



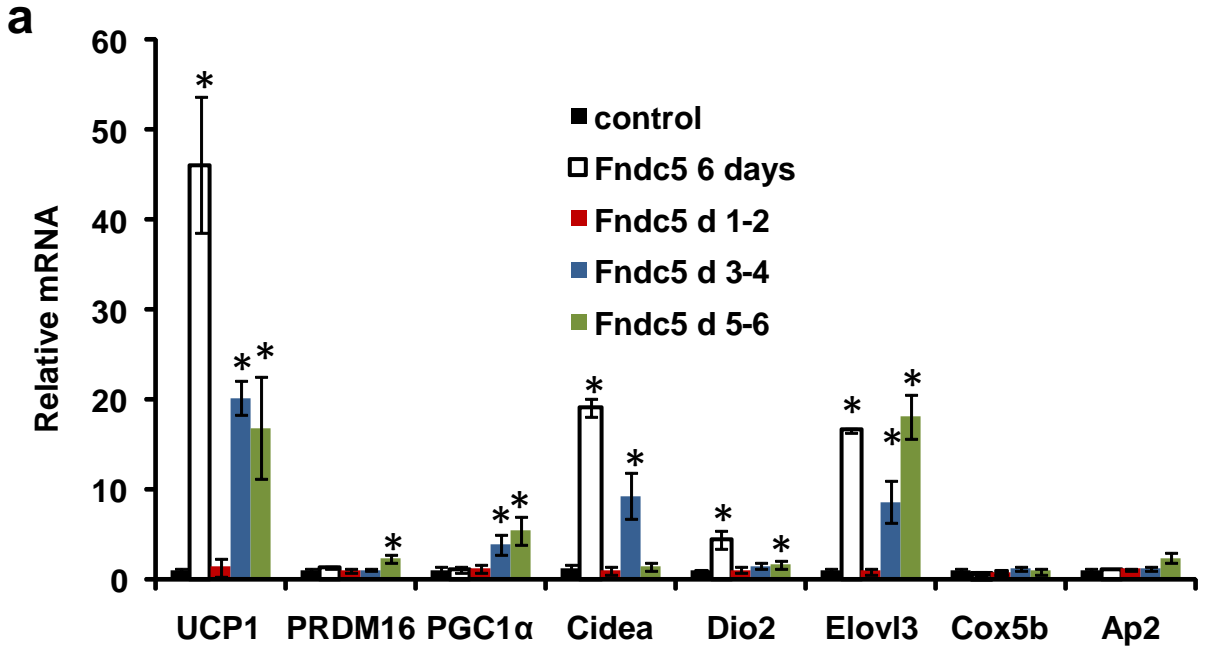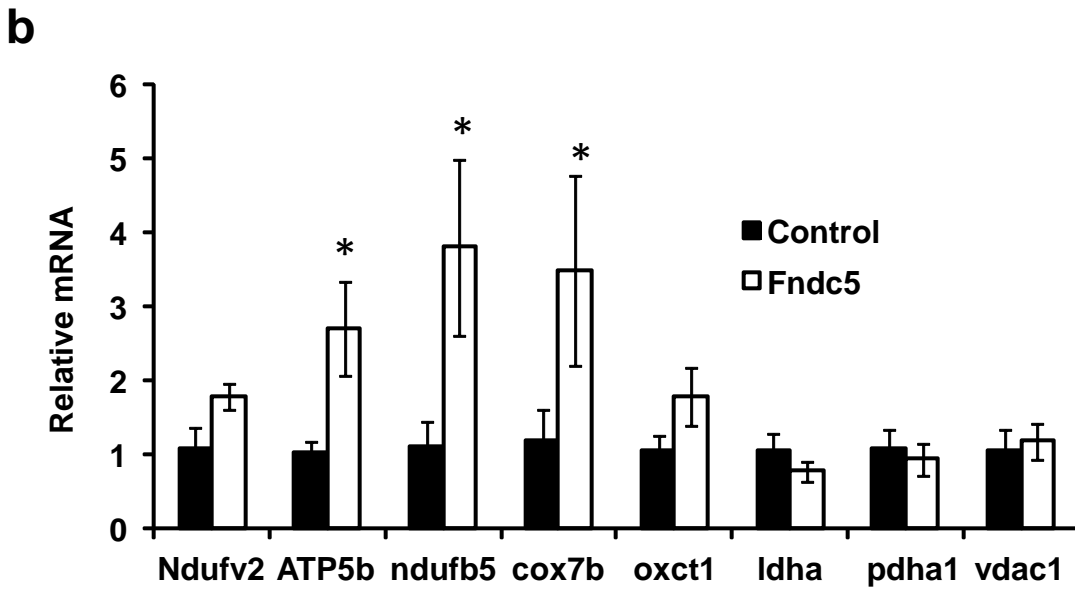

**a**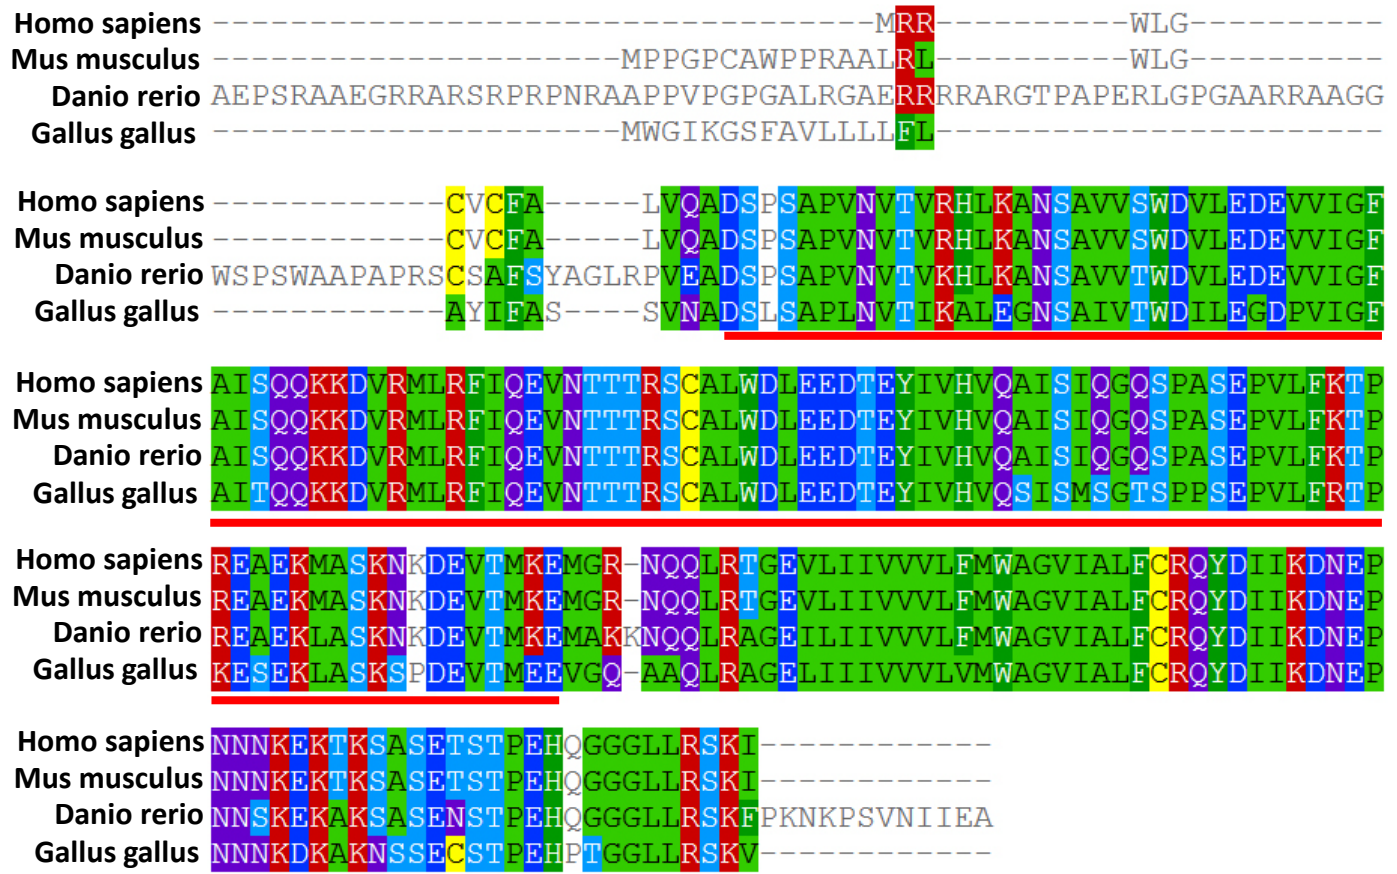**b**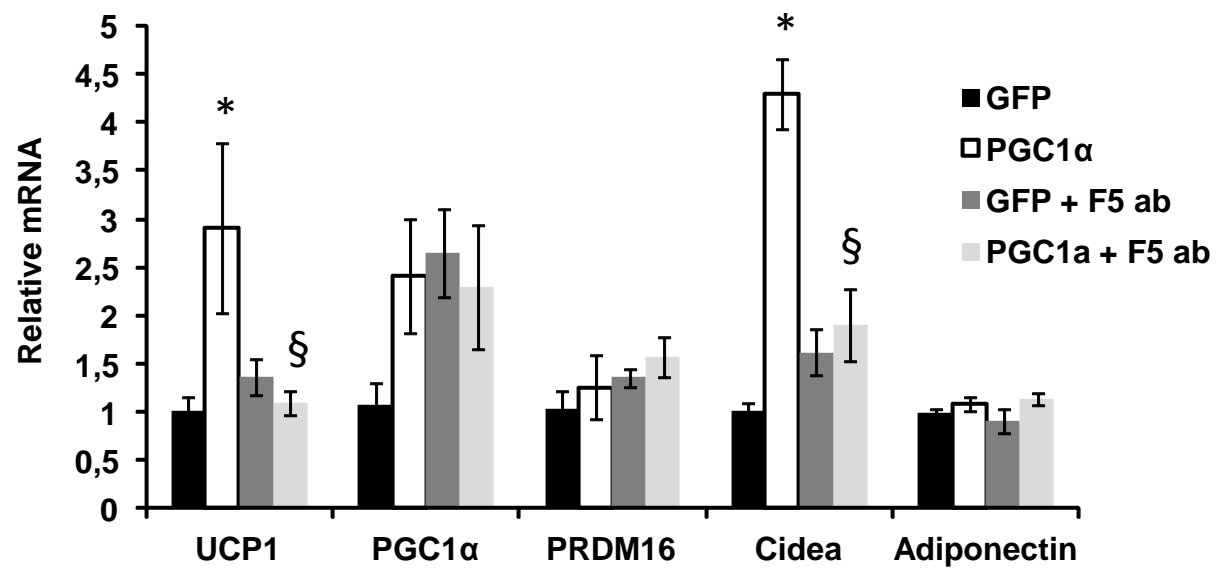

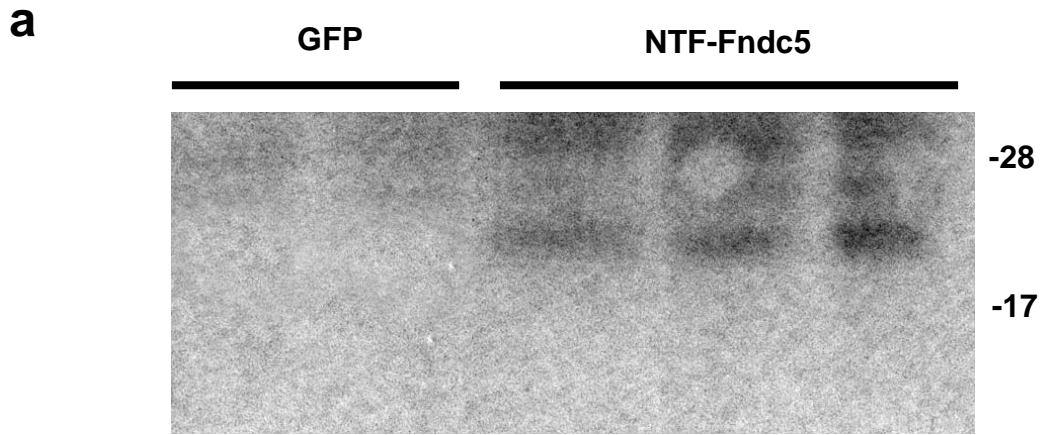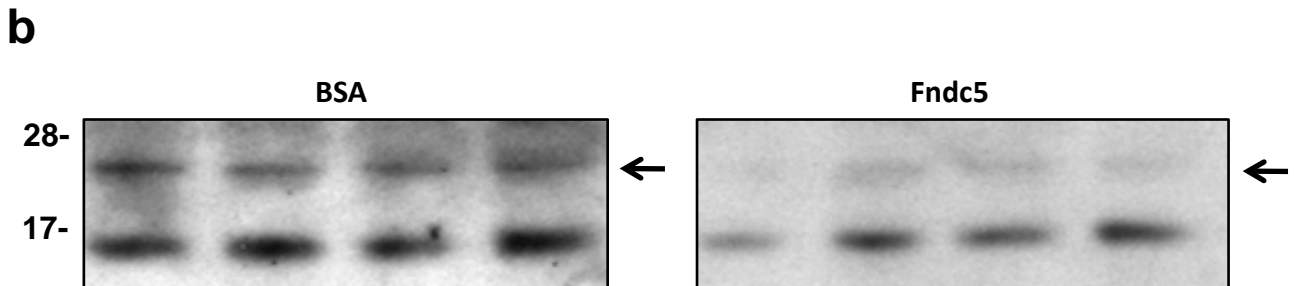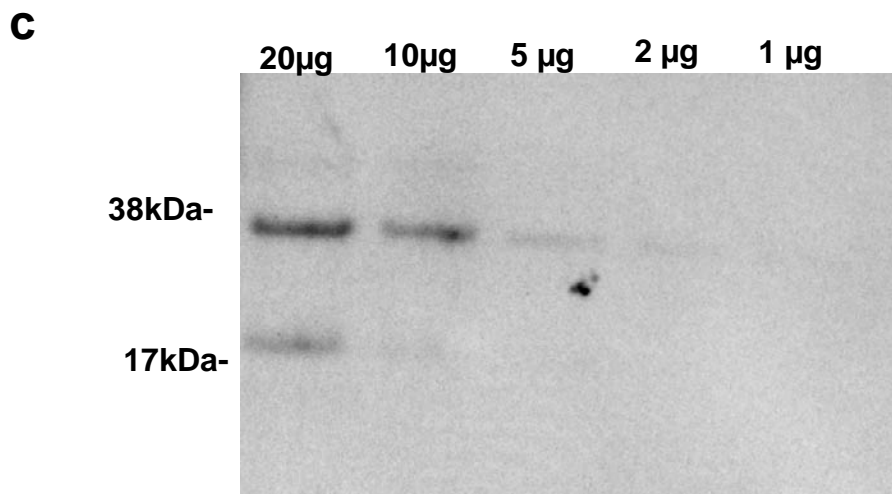

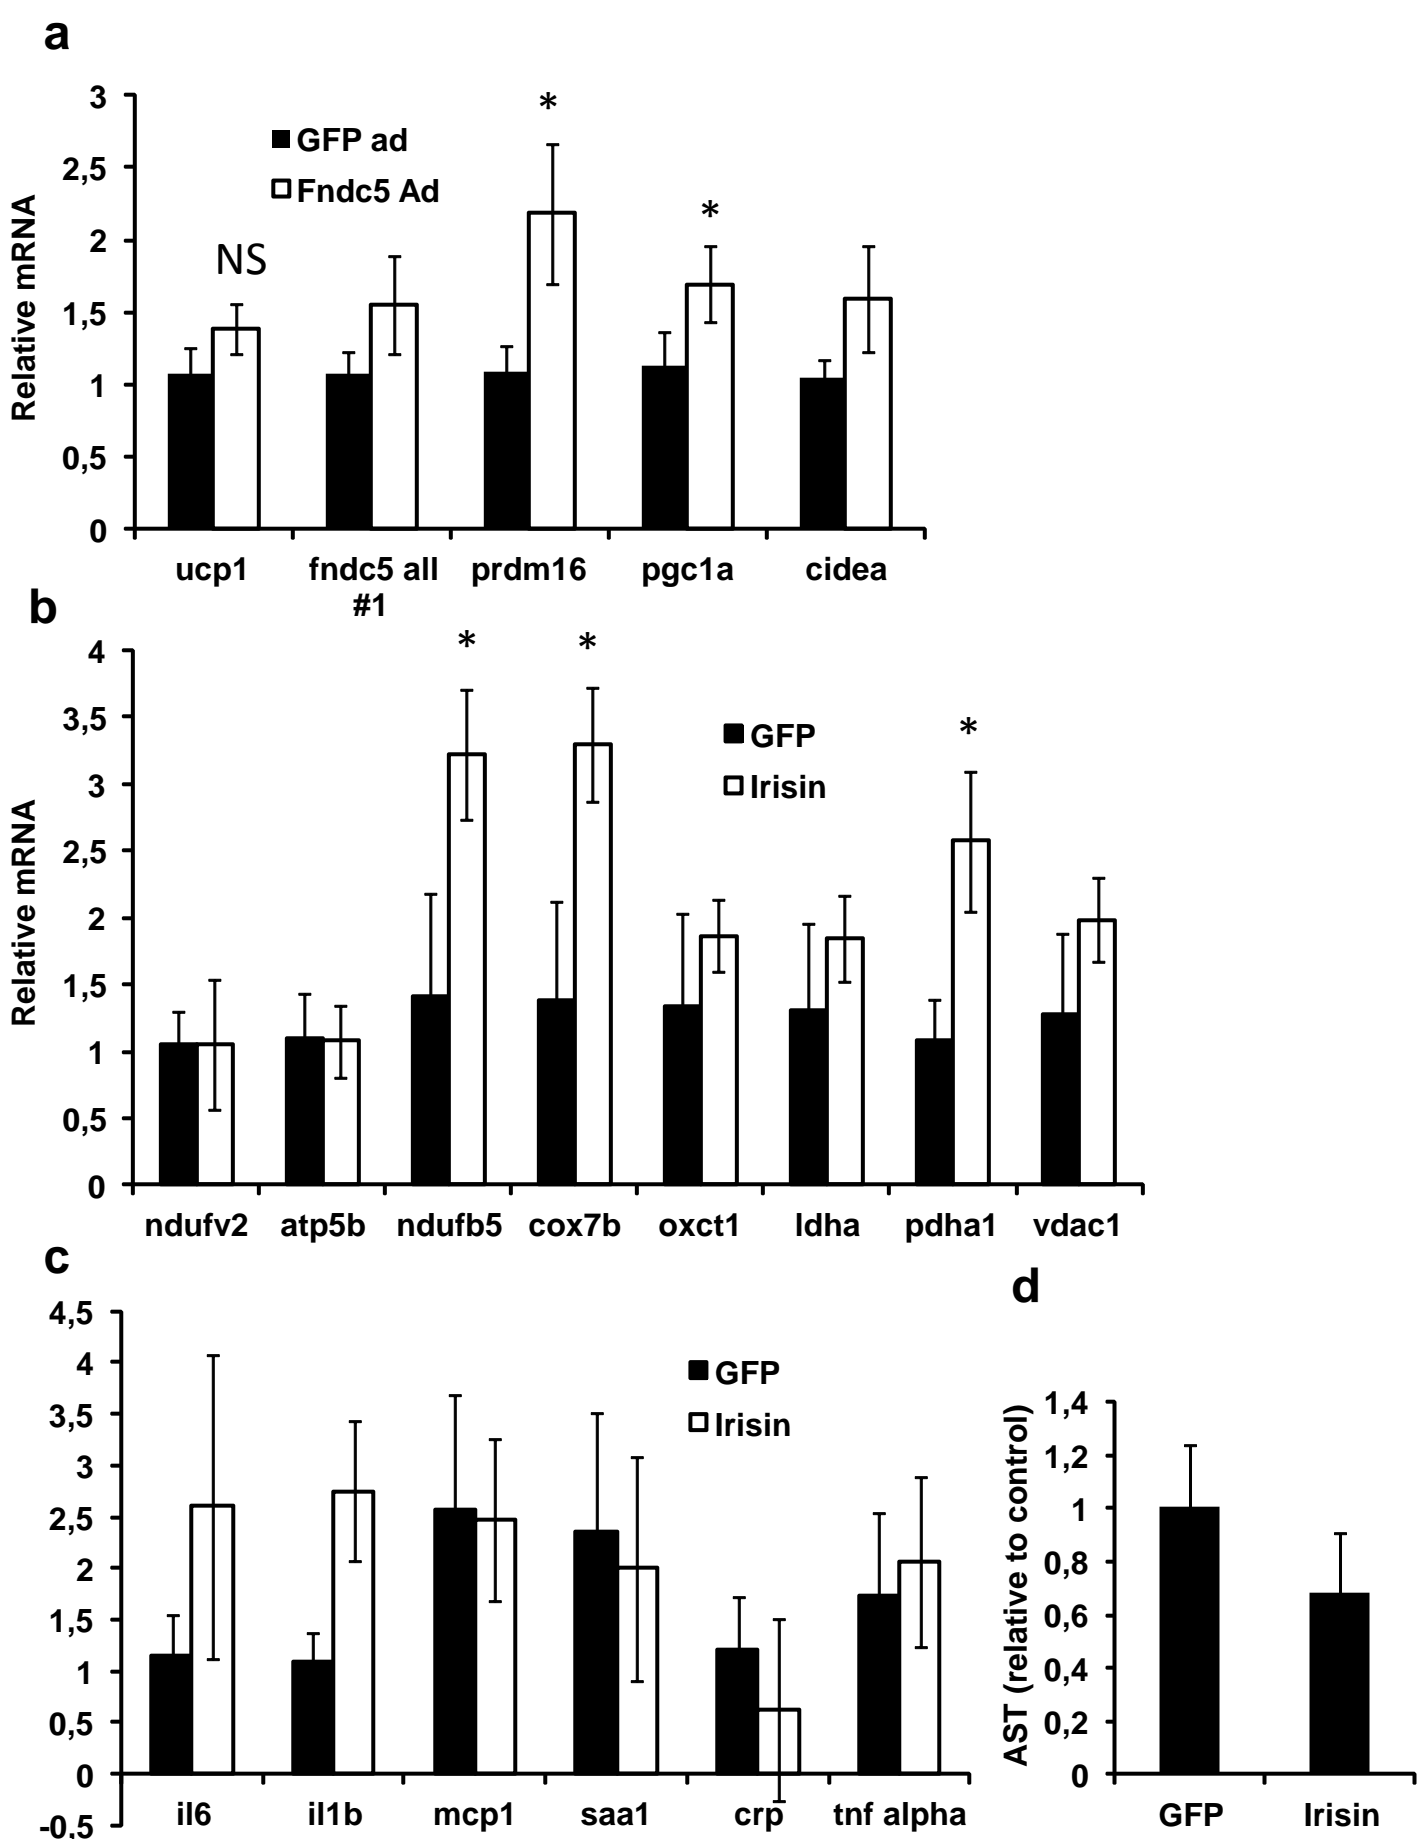

**a**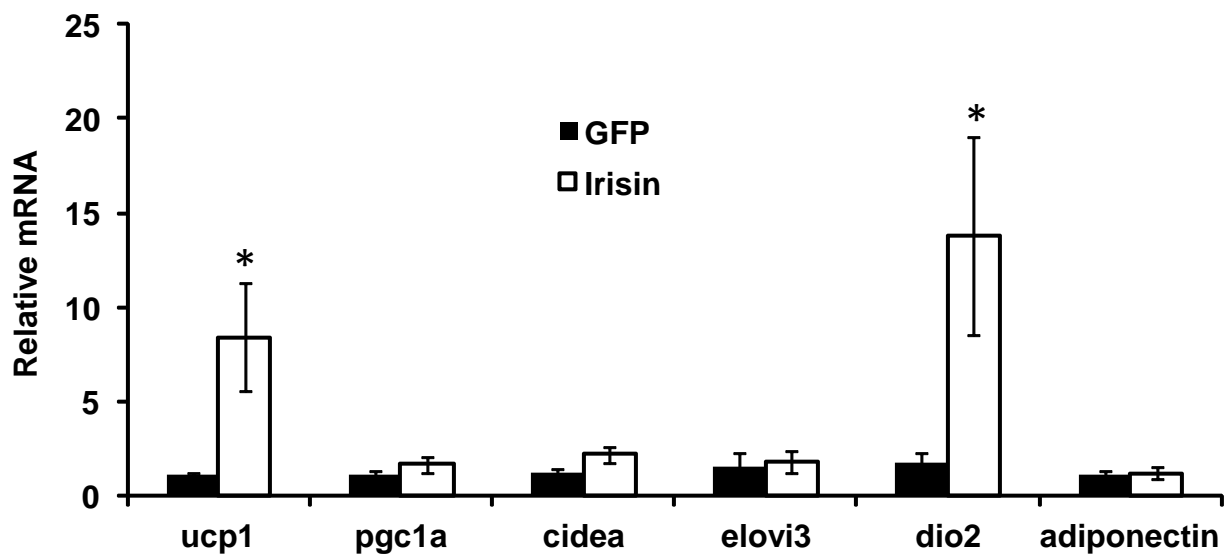**b**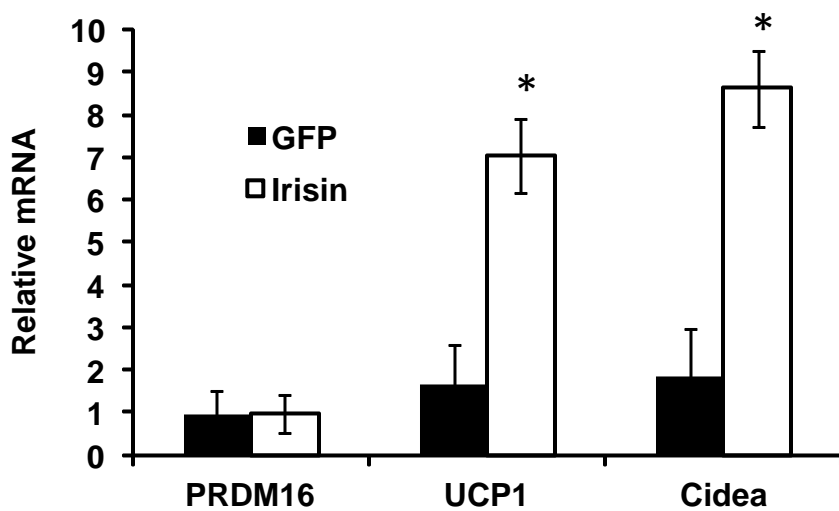

**a**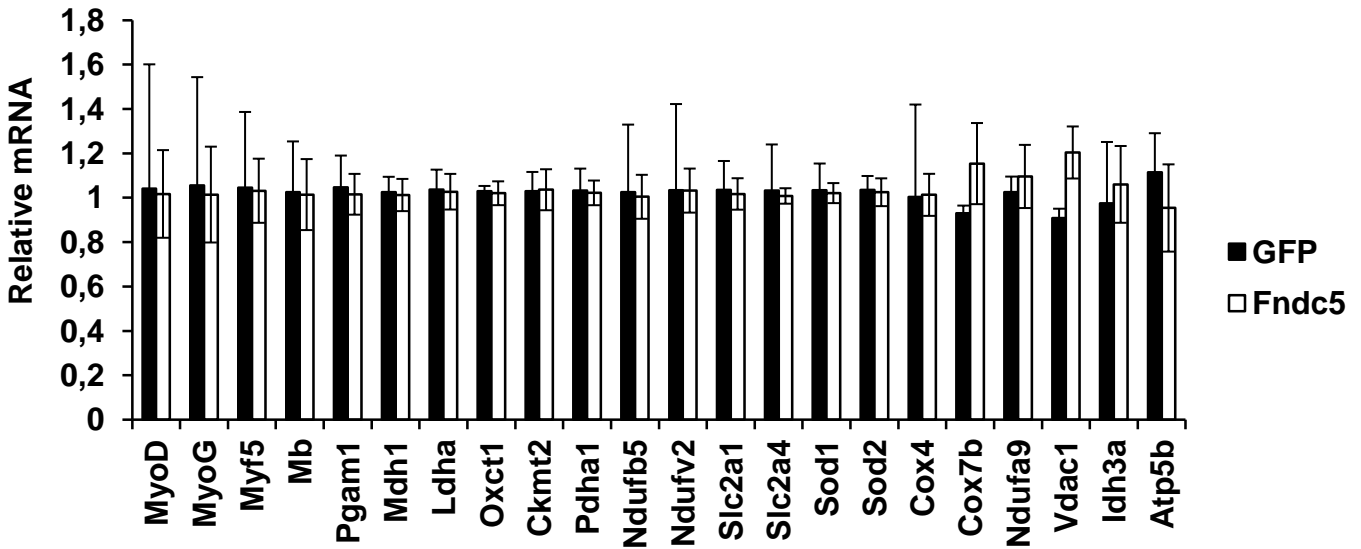**b**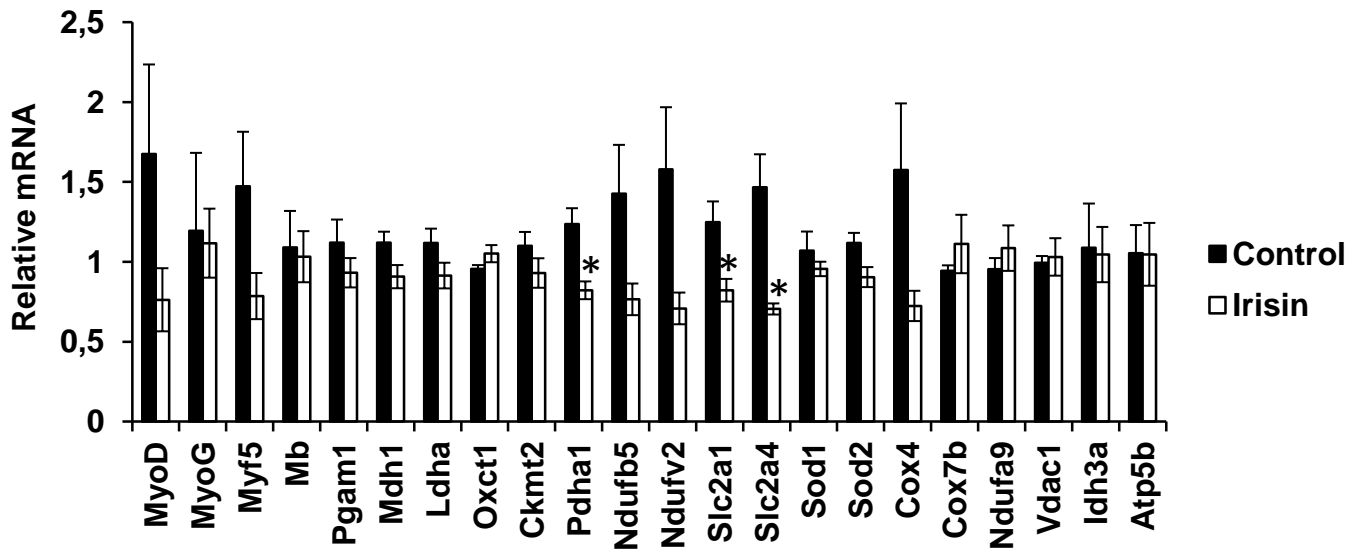

| <b>Gene</b>  | <b>Forward primer</b>          | <b>Reverse primer</b>                             |
|--------------|--------------------------------|---------------------------------------------------|
| m18s         | TCAAGAACGAAAGTCGGAGG           | GGACATCTAAGGGCATCAC                               |
| mFndc5 1 UTR | ggactcttgaaaacaccactg          | tccacacagatgatctcaccac                            |
| mFndc5 2     | atgaaggagatggggaggaa           | gcggcagaagagagctataaca                            |
| mAp2         | ACA CCG AGA TTT CCT TCA AAC TG | CCA TCT AGG GTT ATG ATG<br>CTC TTC A              |
| mCidea       | TGC TCT TCT GTA TCG CCC AGT    | GCC GTG TTA AGG AAT CTG<br>CTG                    |
| mPGC1a       | CCC TGC CAT TGT TAA GAC C      | TGC TGC TGT TCC TGT TTT C                         |
| mPRDM16      | CAG CAC GGT GAA GCC ATT C      | GCG TGC ATC CGC TTG TG<br>CCC CTT GTA CCC TTC ACC |
| mTBP         | GAA GCT GCG GTA CAA TTC CAG    | AAT<br>CTT TGC CTC ACT CAG GAT                    |
| mUCP1        | ACT GCC ACA CCT CCA GTC ATT    | TGG<br>GTA GGT GAA GAG AAC GGC                    |
| mAdiponectin | GCA CTG GCA AGT TCT ACT GCA A  | CTT GT                                            |
| mVEGFb       | tatctcccagagctgccatcta         | agccagaagatgctcacttgac                            |
| mIl15        | gaggccaagaagagtctggat          | tgcccaggttaagagcttcaa                             |
| mTIMP4       | gacctgctgacactcaaaaac          | ggaagagtcaaatggcgtgtag                            |
| mLrg1        | cctcaaggaatgcctgatactg         | ttggagaattccaccgacag                              |
| hTIMP4       | caggtcctcagtgatggaaaag         | gtgatttggcagccacagtt                              |
| hFndc5       | aagcacaaggactgactcaagc         | catgtccttgatggctggat                              |
| hLrg1        | ctagaacacacgatgggctttc         | tcagctggaaggaaggacaa                              |
| hIL-15       | tcagtgacgggcttctaata           | tggggtgaacatcactttcc                              |
